# Supplementary material for: Hydrogen atom transfer reactions of ferrate(vi) with phenols and hydroquinone. Correlation of rate constants with bond strengths and application of the Marcus cross relation
Source: Royal Society of Chemistry journal article supplement (doi:10.1039/c5dt04303d), 2015-11-13
Supplement: c5dt04303d1.pdf [file c5dt04303d1.pdf]

**Electronic Supplementary Material (ESI) for Dalton Transactions.**

**This journal is © The Royal Society of Chemistry 2015**

## **Supporting Information**

**Hydrogen atom transfer reactions of ferrate(VI) with phenols and hydroquinone.  
Correlation of rate constants with bond strengths and application of the Marcus  
cross relation.**

Jianhui Xie, Li Ma, William W. Y. Lam, Kai-Chung Lau and Tai-Chu Lau\*

## Experimental Section

**Materials.** Potassium ferrate ( $K_2FeO_4$ ) (>98%) was prepared according to a literature method.<sup>1</sup> All phenols and hydroquinone were of reagent grade and were purchased from Aldrich. Phenol and 4-methoxyphenol were recrystallized from petroleum ether.<sup>2</sup>  $D_2O$  (99.8 atom % D, Acrôs) was used as received. Water for kinetic experiments was distilled twice from alkaline permanganate. Ionic strength was maintained with sodium perchlorate. The  $pD$  values for all  $D_2O$  solutions were determined by using a pH meter with the relationship  $pD = pH_{meas} + 0.4$ .

**Kinetics.** Kinetic experiments were performed using either an Agilent 8453 diode array spectrophotometer or a Hi-Tech SF-61 stopped-flow spectrophotometer. The concentrations of phenols were at least in 10-fold excess of that of ferrate(VI). Stock solutions of ferrate(VI) were prepared in sodium hydroxide solution at  $pH = 10$ , at this  $pH$  ferrate(VI) is stable for >20 h at 23 °C. Stock solutions of phenol were prepared in  $NaH_2PO_4/Na_2HPO_4$  buffer. The reaction was started by mixing the ferrate solution. The reaction progress was monitored by observing absorbance changes at 510 nm and 400 nm. Pseudo-first-order rate constants,  $k_{obs}$ , were obtained by nonlinear least-squares fits of  $A_t$  vs  $t$  according to the equation  $A_t = A_\infty + (A_0 - A_\infty)\exp(-k_{obs}t)$ , where  $A_0$  and  $A_\infty$  are the initial and final absorbances, respectively.

Second-order rate constants were obtained from plots of  $k_{obs}$  vs concentration of organic substrates. The y-intercept of the plots should be related to the rate constants for the self-decay of ferrate, and they are more or less constant for the various phenol derivatives. For H2Q since the rate is much faster, self-decay of ferrate is negligible. There is a slightly negative intercept in Figure 3, which we think is due to instrumental error of the stopped-flow, since the reaction is very fast and is close to the limit of our instrument.

The  $pH$  of the reaction mixture was determined by mixing an equal volume of organic substrate with ferrate and the  $pH$  was then measured using a  $pH$  meter. The  $pH$  of the reaction mixture usually increased by less than 0.1  $pH$  unit after mixing and remained constant throughout the reaction.

**Product analysis.**

**Product of phenol oxidation.** In a typical experiment, 1.0 ml ferrate (1.2  $\mu\text{mol}$ ) solution (pH = 10) was added to 1.5 ml phenol (19.7  $\mu\text{mol}$ ) solution (pH = 7). The mixture was stirred for 10 minutes and then analyzed by GC and GC-MS using cyclohexanone as internal standard. The results indicate that 0.78  $\mu\text{mol}$  phenol was consumed and 0.39  $\mu\text{mol}$  *p*-benzoquinone was produced.

**Product of hydroquinone oxidation.** In a typical experiment, 0.9 ml ferrate (5.66  $\mu\text{mol}$ ) solution (pH = 10) was added to 1.0 ml hydroquinone (106.9  $\mu\text{mol}$ ) solution (pH = 6.2) under argon. The mixture was analyzed by GC and GC-MS using cyclohexanone as internal standard. The results indicate that 6.76  $\mu\text{mol}$  *p*-benzoquinone was generated.

## Calculations

**BDFEs of the phenols in H<sub>2</sub>O.** According to equations (4)-(6) in the main text, BDFE<sub>g</sub> is obtained by equation (4) using BDE<sub>g</sub> and  $S^\circ(\text{H}^\cdot) = 27.42 \text{ cal K}^{-1} \text{ mol}^{-1}$ . Then BDFE<sub>g</sub> is converted to BDFE<sub>H<sub>2</sub>O</sub> according to equation (5) based on  $\Delta G^\circ_{\text{H}_2\text{O}}(\text{H}^\cdot)$  in H<sub>2</sub>O<sup>5</sup> and the difference in the free energies of solvation of X-PhO<sup>·</sup> and X-PhOH. The free energies of solvation of X-PhO<sup>·</sup> and X-PhOH are estimated by equation (6).  $\alpha_2^{\text{H}}$  is H-bonding acidity parameter of solvent and solute and is obtained from ref 3.  $\beta_2^{\text{H}}$  is H-bonding basicity parameter of solvent and solute and is obtained from ref 4 and 5.

**H-atom self-exchange rates of phenol and hydroquinone in H<sub>2</sub>O.** The H-atom self-exchange rates in water,  $k_{22}(\text{PhOH})$  and  $k_{22}(\text{H}_2\text{Q})$ , were obtained according to the relationship shown in equation (16).<sup>5</sup>

$$\log(k_{\text{solv1}}) - \log(k_{\text{solv2}}) = -8.3\alpha_2^{\text{H}}(\text{PhOH}/\text{H}_2\text{Q})[\beta_2^{\text{H}}(\text{solv1}) - \beta_2^{\text{H}}(\text{solv2})] \quad (16)$$

Using  $\alpha_2^{\text{H}}(\text{PhOH}) = 0.596$ ,<sup>3</sup>  $\beta_2^{\text{H}}(\text{water}) = 0.38$ ,  $\beta_2^{\text{H}}(\text{DTBP}) = 0.35$ ,  $\beta_2^{\text{H}}(\text{CCl}_4) = 0^4$  and  $\alpha_2^{\text{H}}(\text{H}_2\text{Q}) = 0.34$ <sup>6</sup>, the H-atom self-exchange rate of phenol and hydroquinone in H<sub>2</sub>O, are  $2.27 \times 10^5 \text{ M}^{-1} \text{ s}^{-1}$  and  $2.55 \times 10^3 \text{ M}^{-1} \text{ s}^{-1}$ , respectively.

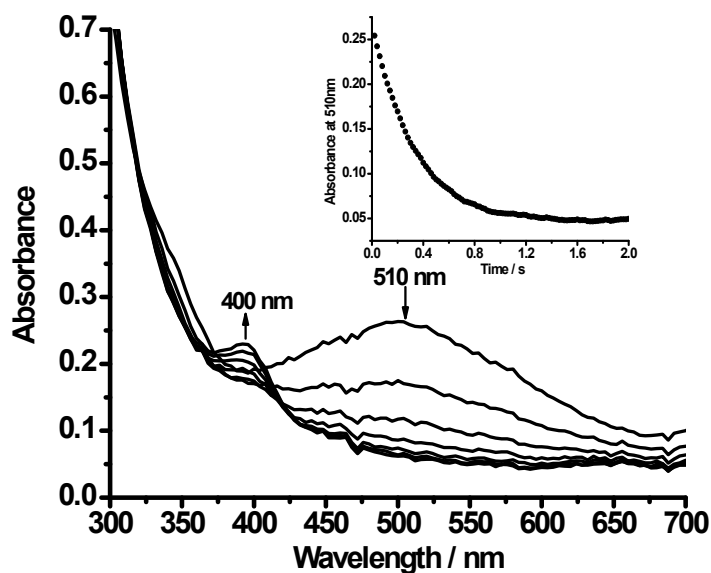

**Figure S1** Spectral changes at 0.075s intervals during the first step of the oxidation of phenol ( $1.80 \times 10^{-2}$  M) by ferrate(VI) ( $3.00 \times 10^{-4}$  M) at 298.0K ( $I = 0.3$  M; pH = 7.2). Inset shows the absorbance-time trace at 510 nm.

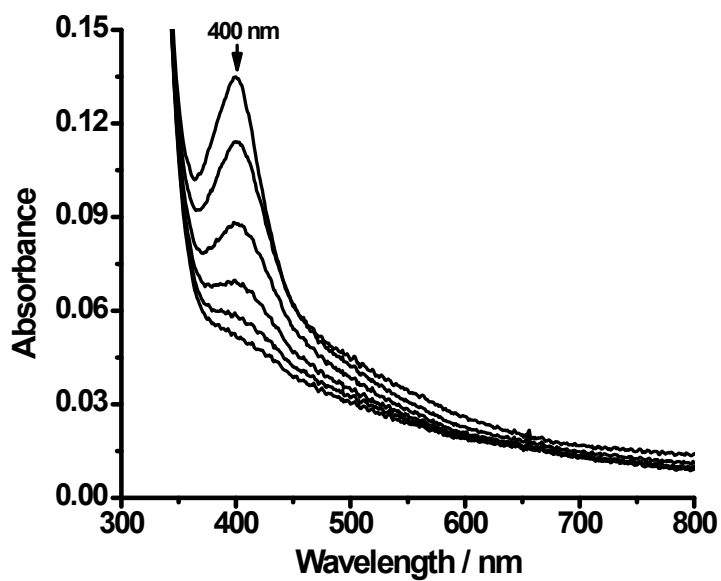

**Figure S2** Spectral changes at 4s intervals during the second step of the oxidation of phenol ( $1.80 \times 10^{-2}$  M) by ferrate(VI) ( $3.00 \times 10^{-4}$  M) at 298.0K ( $I = 0.3$  M; pH = 8.4).

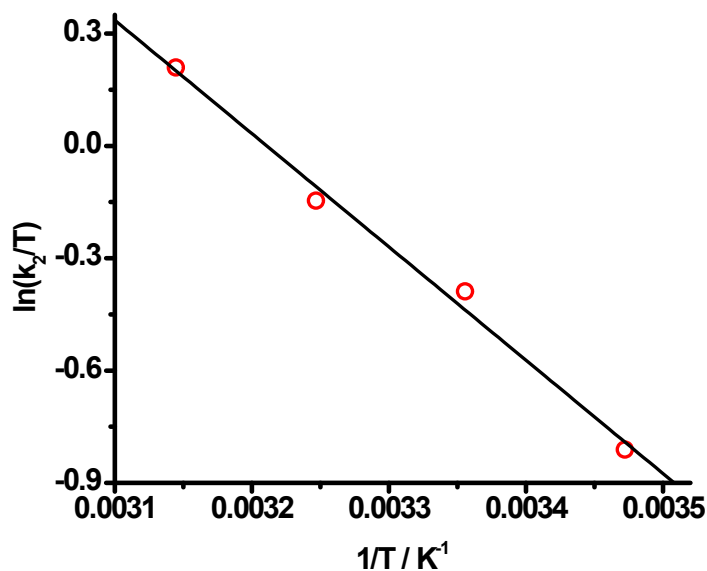

**Figure S3** Plot of  $\ln(k_2/T)$  vs  $1/T$  for the oxidation of phenol by ferrate(VI) ( $3.00 \times 10^{-4}$  M) at 298.0 K ( $I = 0.3$  M; pH = 6.2). [Slope =  $-(3.03 \pm 0.19) \times 10^3$ ; y-intercept =  $(9.72 \pm 0.63)$ ;  $r^2 = 0.99$ ]

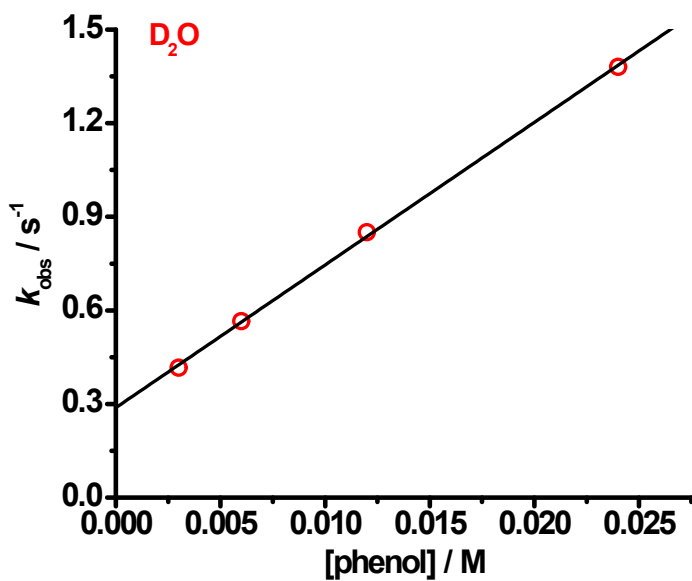

**Figure S4** Plot of  $k_{\text{obs}}$  vs [phenol] for the oxidation of phenol by ferrate ( $3.00 \times 10^{-4}$  M) at 298.0 K, pD = 6.2 and  $I = 0.3$  M. (Slope =  $(4.58 \pm 0.08 \times 10^1)$ ; y-intercept =  $(2.88 \pm 0.10) \times 10^{-1}$ ;  $r^2 = 0.999$ )

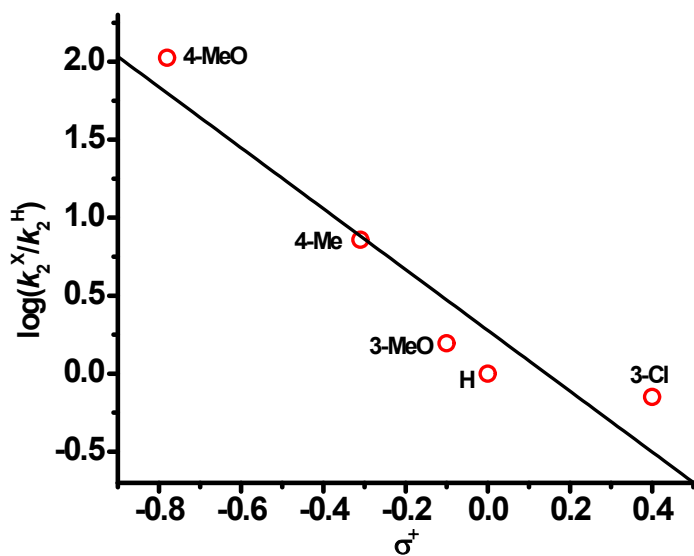

**Figure S5** Hammett plot of  $\log(k_2^x/k_2^H)$  vs  $\sigma^+$  for the oxidation of phenols by ferrate(VI) at 298.0 K in H<sub>2</sub>O (pH = 6.2;  $I = 0.3$  M). [Slope =  $-(2.0 \pm 0.4)$ ; y-intercept =  $-(3.0 \pm 1.0) \times 10^{-1}$ ;  $r^2 = 0.86$ ]

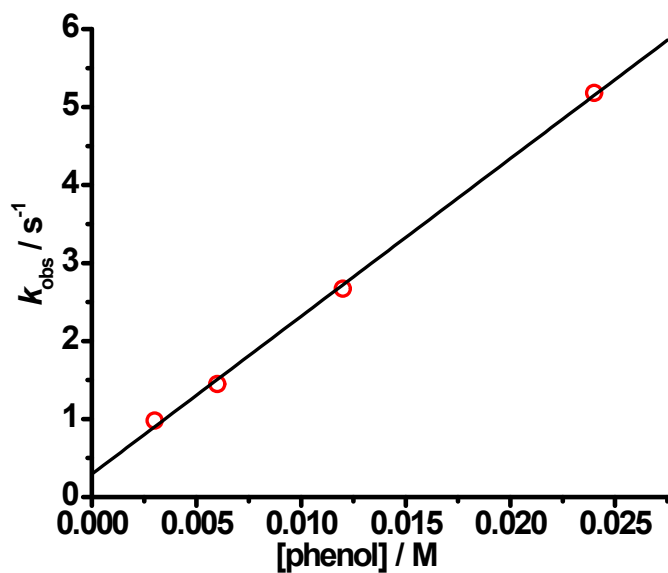

**Figure S6** Plot of  $k_{\text{obs}}$  vs  $[\text{phenol}]$  for the oxidation of phenol by ferrate ( $3.00 \times 10^{-4}$  M) at 298.0 K, pH = 5.3 and  $I = 0.3$  M. (Slope =  $(2.02 \pm 0.05) \times 10^3$ ; y-intercept =  $(2.93 \pm 0.70) \times 10^{-1}$ ;  $r^2 = 0.998$ )

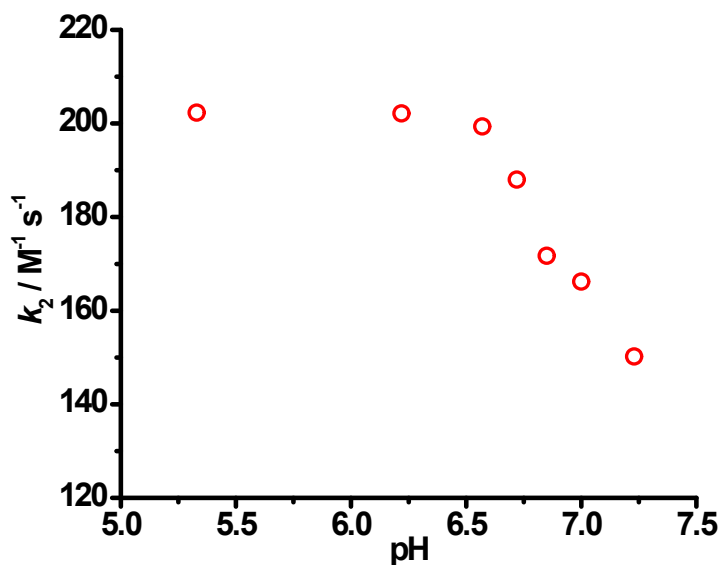

**Figure S7** Plot of  $k_2$  vs pH for the oxidation of phenol by ferrate ( $3.00 \times 10^{-4}$  M) at 298.0 K and  $I = 0.3$  M.

## References

- 1 G. W. Thompson, L. T. Ockerman and J. M. Schreyer, *J. Am. Chem. Soc.*, 1951, **73**, 1279.
- 2 W. L. F. Amarego and C. L. L. Chai, *Purification of Laboratory Chemicals*, 5th ed.; Butterworth Heinemann: New York, 2003.
- 3 M. H. Abraham, P. L. Grellier, D. V. Prior and P. P. Duce, *J. Chem. Soc. Perkin Trans. 2*, 1989, 699-711.
- 4 M. H. Abraham, *J. Chem. Soc. Perkin Trans. 2*, 1990, 521-529.
- 5 J. J. Warren and J. M. Mayer, *Proc. Natl. Acad. Sci. U. S. A.*, 2010, **107**, 5282.
- 6 J. P. Roth, J. C. Yoder, T. J. Won and J. M. Mayer, *Science*, 2001, **294**, 2524. According this reference, the H-atom self-exchange rates of  $\text{H}_2\text{Q}$  are  $3 \times 10^4 \text{ M}^{-1} \text{ s}^{-1}$  in  $\text{CCl}_4$  and  $1.72 \times 10^3 \text{ M}^{-1} \text{ s}^{-1}$  in  $\text{CH}_3\text{CN}$ , respectively. Therefore,  $\alpha_2^{\text{H}}(\text{H}_2\text{Q})$  is estimated to be 0.34 based on equation (16) and  $\beta_2^{\text{H}}(\text{CH}_3\text{CN}) = 0.44$  from ref 4.
